# Supplementary material for: Towards Estimation of HIV-1 Date of Infection: A Time-Continuous IgG-Model Shows That Seroconversion Does Not Occur at the Midpoint between Negative and Positive Tests
Source: PubMed Central journal article supplement (PMC3628711; doi:10.1371/journal.pone.0060906), 2013-04-16

OD-n

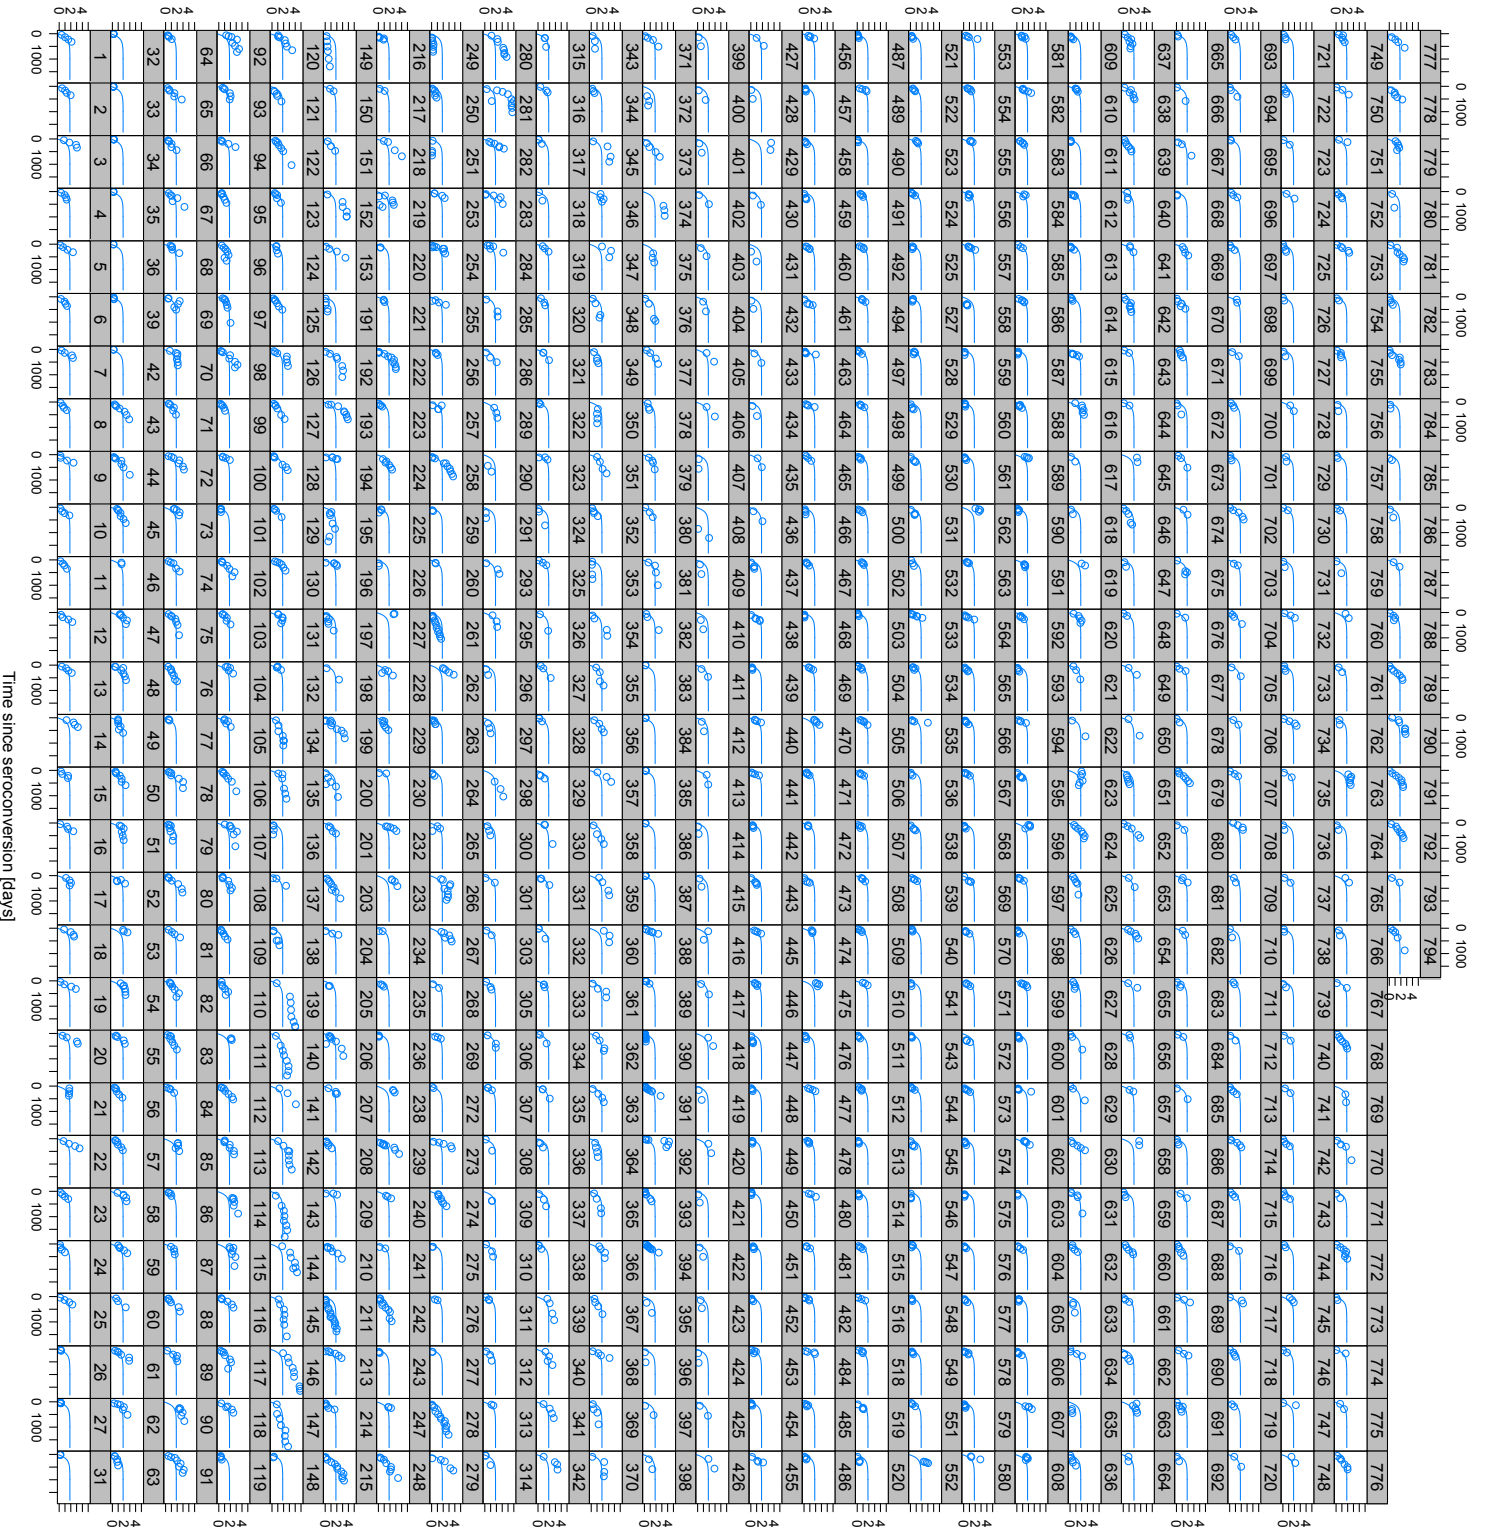

Supplement: pone.0060906.s002.pdf [file pone.0060906.s002.pdf]
